# Supplementary material for: Regenerating spent LiFePO4 with tailored molecular groups: from bulk lattice repair to surface conductive coating for enhanced cycling stability
Source: Royal Society of Chemistry journal article supplement (doi:10.1039/d6sc01492e), 2026-04-07
Supplement: d6sc01492e1.pdf [file d6sc01492e1.pdf]

**Supporting Information for:**  
**Regenerating Spent LiFePO<sub>4</sub> with Tailored Molecular  
Groups: From Bulk Lattice Repair to Surface  
Conductive Coating for Enhanced Cycling Stability**

*Yi Chen<sup>&</sup>, Xizhuo Chen<sup>&</sup>, Zihao Zeng, Wei Sun, Yue Yang, Peng Ge\**

School of Minerals Processing and Bioengineering, Central South University,  
Changsha 410083, China

<sup>&</sup>These authors contributed to the work equally and should be regarded as co-first authors.

\* Corresponding authors: Prof. Dr Peng Ge.

E-mail of Prof. Dr. P. Ge: [gp-gepeng@csu.edu.cn](mailto:gp-gepeng@csu.edu.cn); [gepeng219122@163.com](mailto:gepeng219122@163.com)

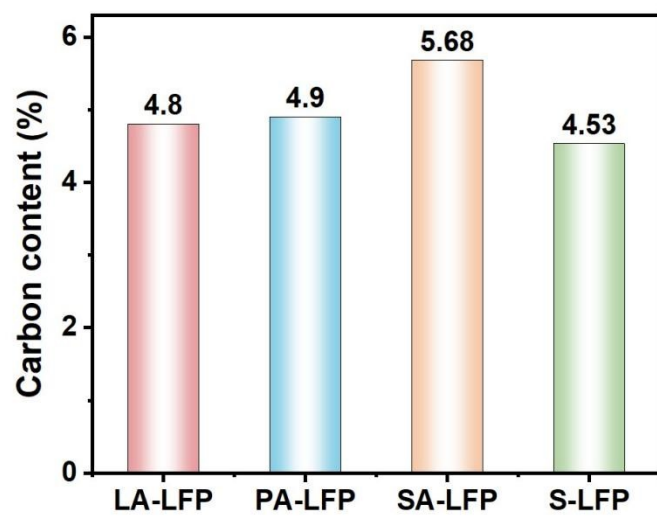

Fig.S1 The carbon content of as-prepared samples

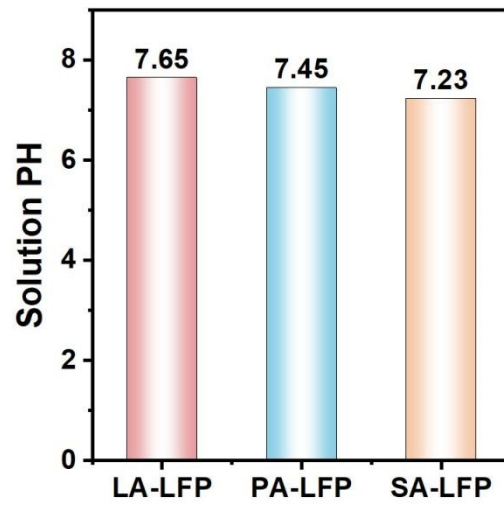

Fig.S2 pH value for different amino acid solutions of as-regenerated samples

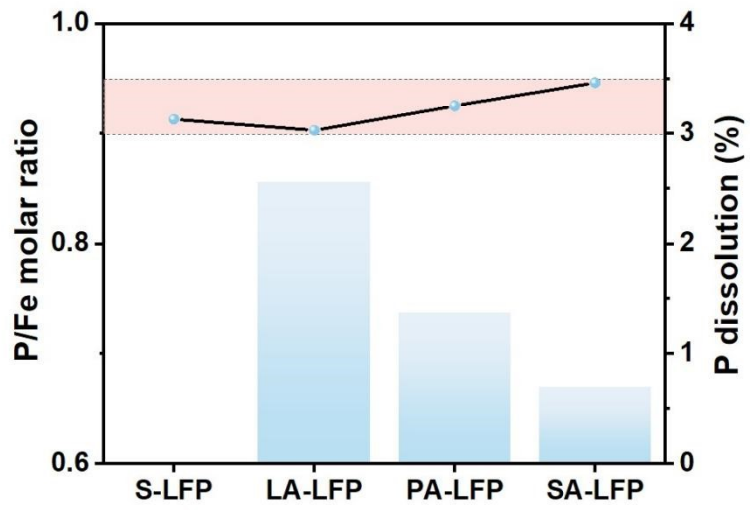

Fig.S3 The ICP results of P/Fe in the samples and P element in the hydrothermal solution

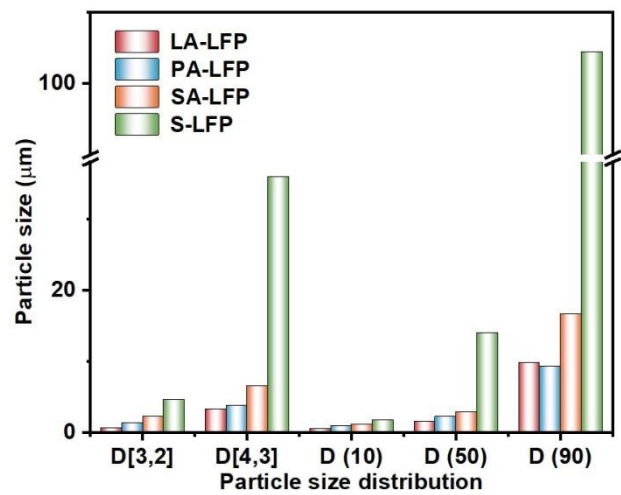

Fig.S4 The particle size parameters of the samples

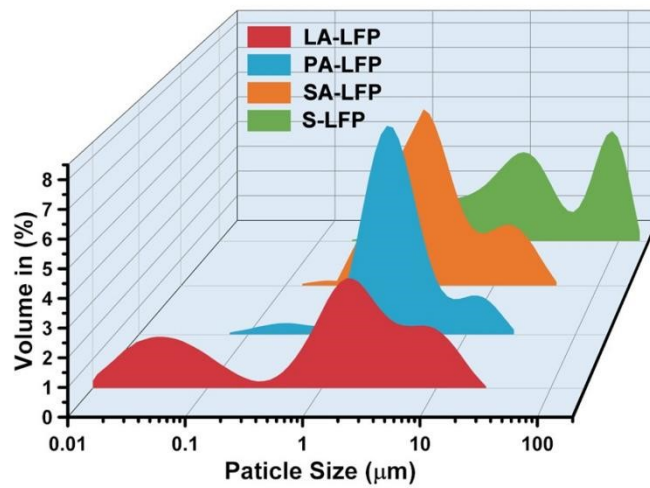

Fig.S5 The particle size distribution of the samples

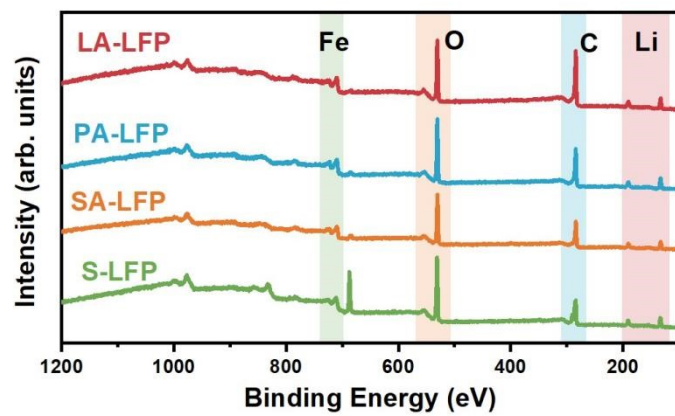

Fig.S6 The full XPS spectrum of the samples

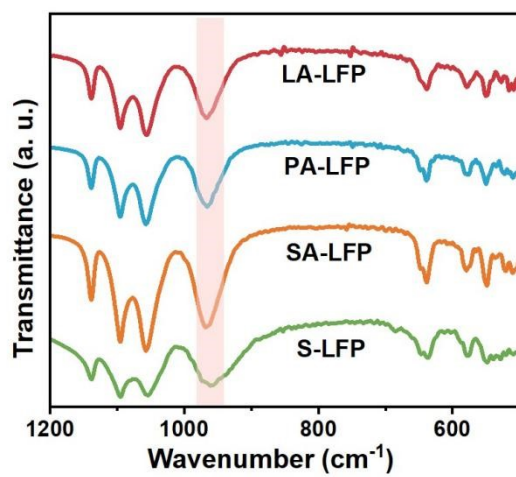

Fig.S7 The FTIR spectrum of the samples

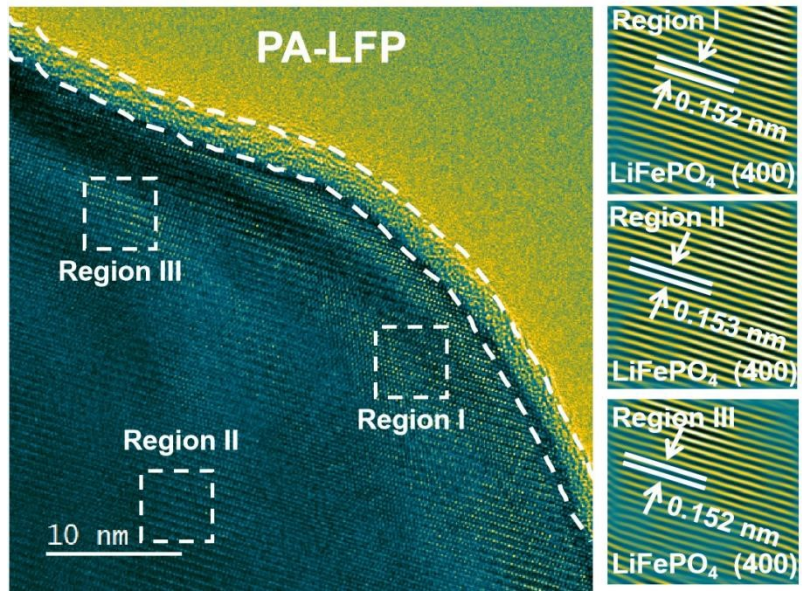

Fig.S8 TEM images of PA-LFP

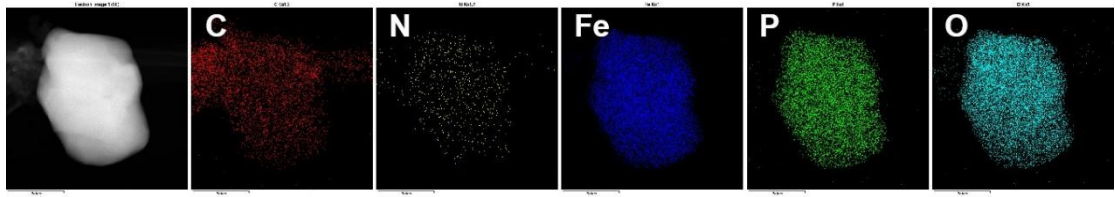

Fig.S9 Mapping images of PA-LFP

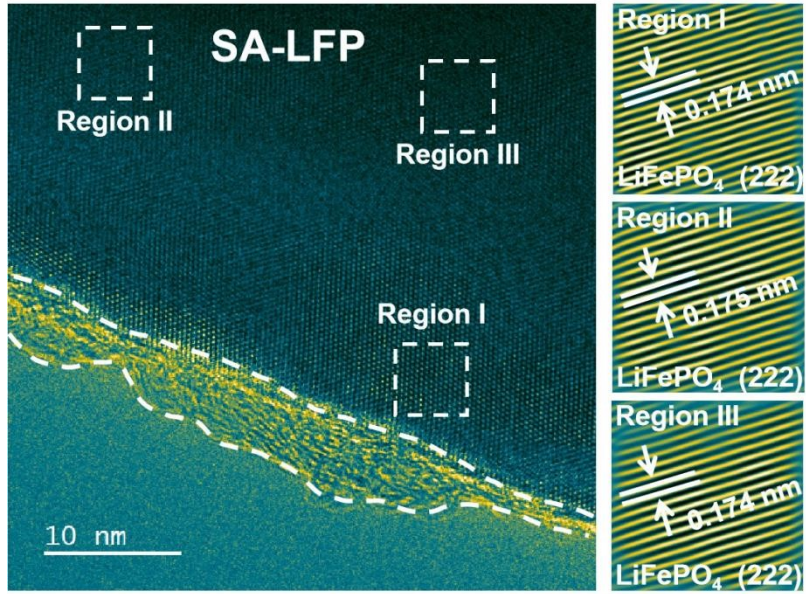

Fig.S10 TEM images of SA-LFP

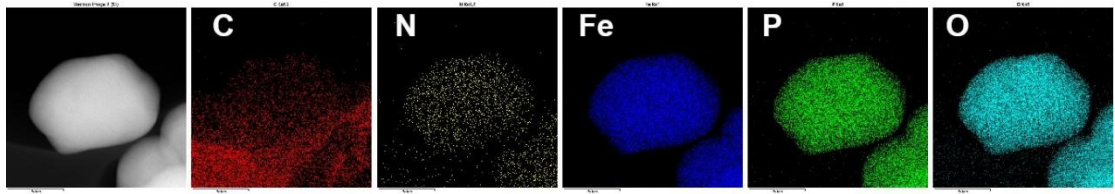

Fig.S11 Mapping images of SA-LFP

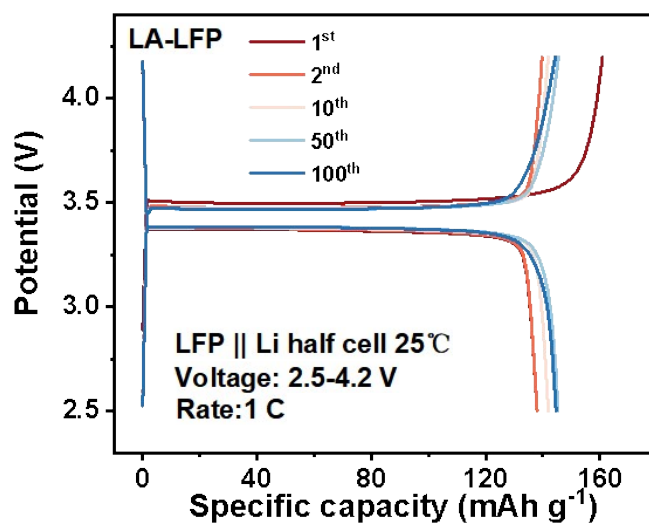

Fig.S12 The charge-discharge platforms of LA-LFP from 1st to 100th cycle and their rate properties

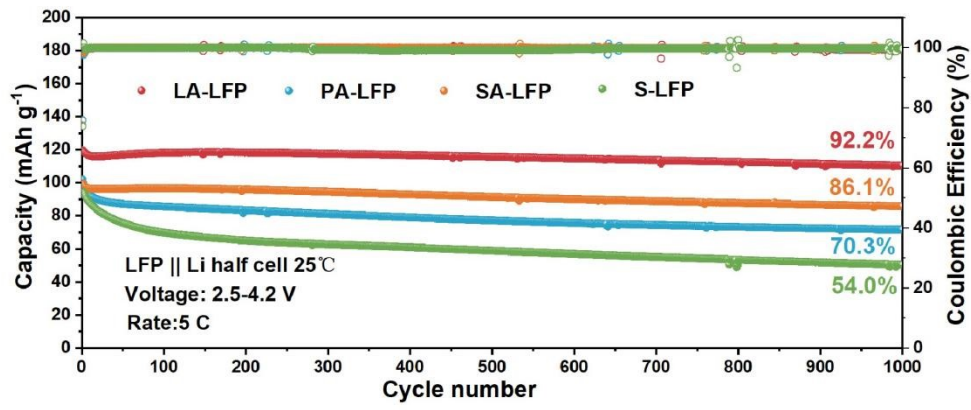

Fig.S13 Cycling performance of samples at 5.0 C

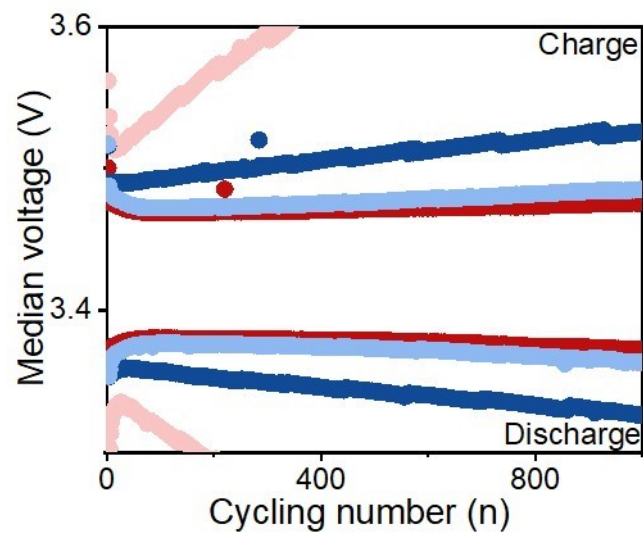

Fig.S14 The charge/discharge median voltages of samples at 1.0 C

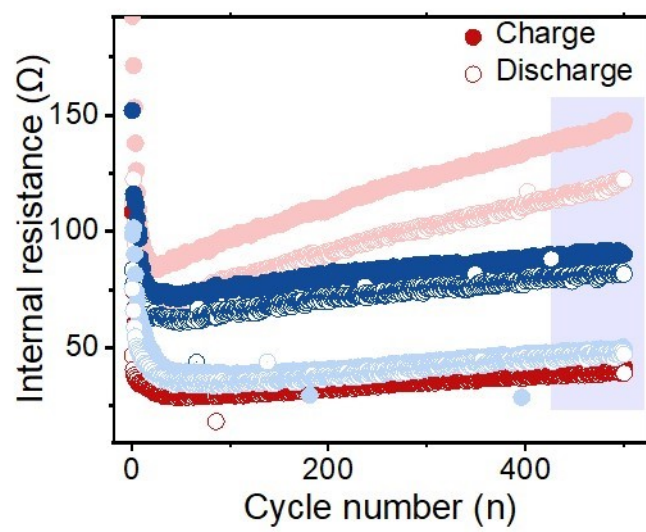

Fig.S15 The internal resistance of samples at 1.0 C

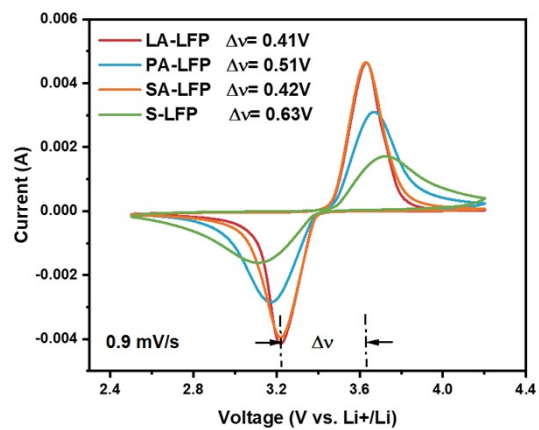

Fig.S16 Voltage difference of as-regenerated samples at 0.9 mV s<sup>-1</sup>

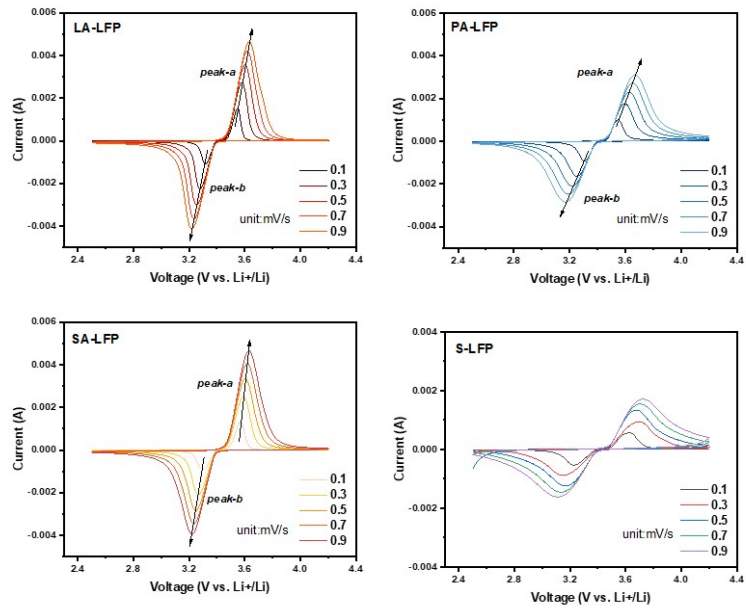

Fig.S17 CV curves of as-regenerated samples

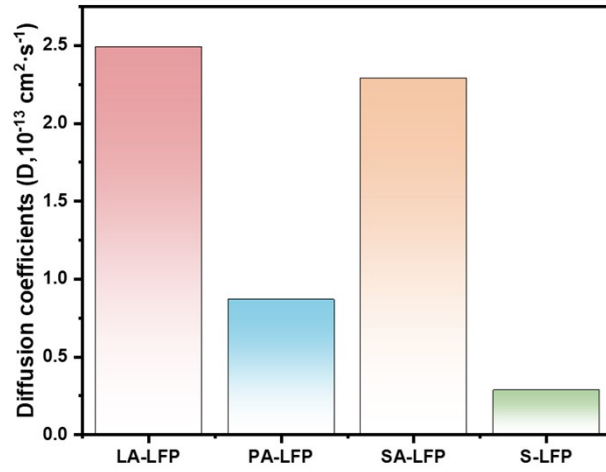

Fig.S18 The calculated results of diffusion coefficient about as-regenerated samples

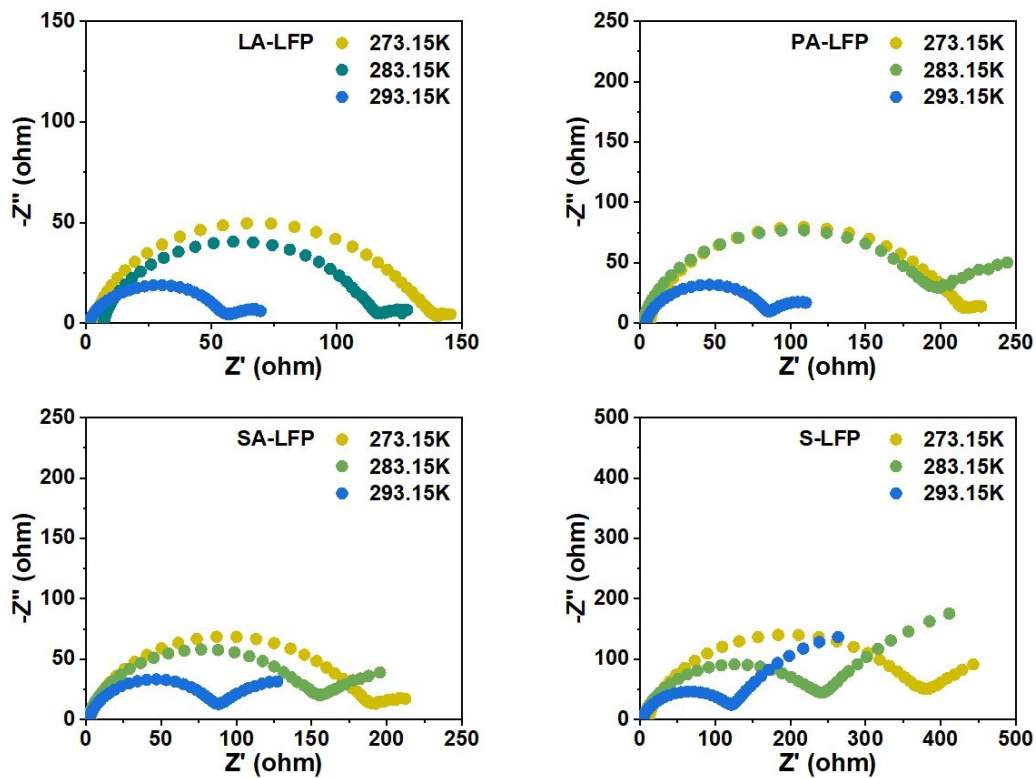

Fig.S19 Nyquist plots of samples at different temperatures

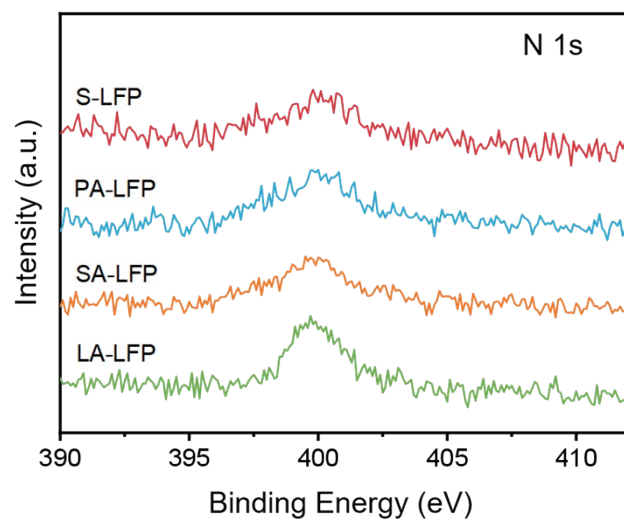

Fig.S20 The N1s XPS spectrum of the samples

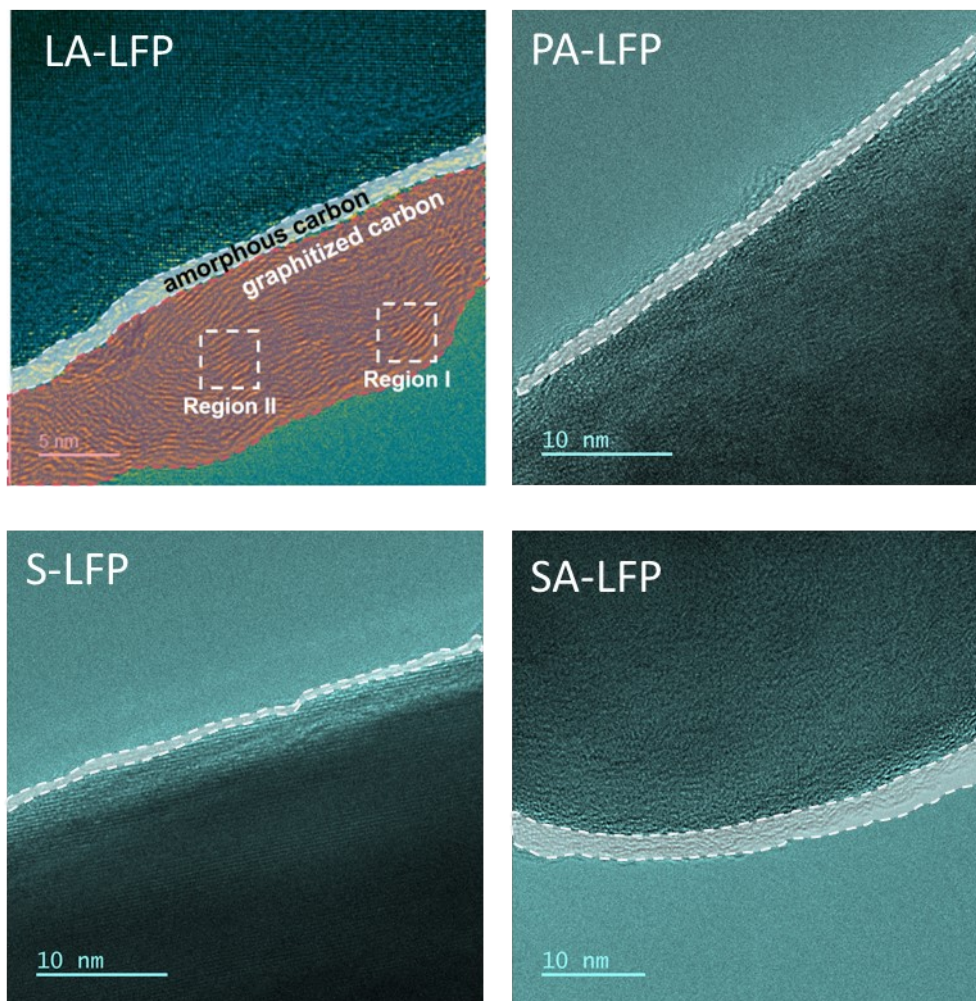

Fig.S21 The comparison of samples carbon layer

Table S1 Rietveld refinement results of high-resolution powder XRD of S-LFP sample

| <b>LiFePO<sub>4</sub> (Space Group Pnma) Phase Ratio: 83.72%</b> |                            |                             |                              |                                 |
|------------------------------------------------------------------|----------------------------|-----------------------------|------------------------------|---------------------------------|
| <b>Lattice Parameters</b>                                        | <b><i>a</i> / Å</b>        | <b><i>b</i> / Å</b>         | <b><i>c</i> / Å</b>          | <b><i>V</i> / Å<sup>3</sup></b> |
|                                                                  |                            | 10.3273                     | 6.0066                       | 4.6909                          |
| <b>Li-Fe Anti-sites</b>                                          | 2.00%                      |                             |                              |                                 |
| <b>FePO<sub>4</sub> (Space Group Pnma) Phase Ratio: 16.28%</b>   |                            |                             |                              |                                 |
| <b>Lattice Parameters</b>                                        | <b><i>a</i> / Å</b>        | <b><i>b</i> / Å</b>         | <b><i>c</i> / Å</b>          | <b><i>V</i> / Å<sup>3</sup></b> |
|                                                                  | 5.8090                     | 9.8390                      | 4.7760                       | 272.97                          |
| <b>Agreement Factors</b>                                         |                            |                             |                              |                                 |
| <b><math>\chi^2</math> 3.07%</b>                                 | <b>R<sub>p</sub> 3.15%</b> | <b>R<sub>wp</sub> 4.04%</b> | <b>R<sub>exp</sub> 2.30%</b> |                                 |

Table S2 Rietveld refinement results of high-resolution powder XRD of LA-LFP sample

| <b>LiFePO<sub>4</sub> (Space Group Pnma) Phase Ratio: 100.00%</b> |                            |                             |                              |                                 |
|-------------------------------------------------------------------|----------------------------|-----------------------------|------------------------------|---------------------------------|
| <b>Lattice Parameters</b>                                         | <b><i>a</i> / Å</b>        | <b><i>b</i> / Å</b>         | <b><i>c</i> / Å</b>          | <b><i>V</i> / Å<sup>3</sup></b> |
|                                                                   |                            | 10.3344                     | 6.0104                       | 4.6939                          |
| <b>Li-Fe Anti-sites</b>                                           | 0.60%                      |                             |                              |                                 |
| <b>Agreement Factors</b>                                          |                            |                             |                              |                                 |
| <b><math>\chi^2</math> 4.07%</b>                                  | <b>R<sub>p</sub> 3.44%</b> | <b>R<sub>wp</sub> 4.46%</b> | <b>R<sub>exp</sub> 2.21%</b> |                                 |

Table S3 Rietveld refinement results of high-resolution powder XRD of PA-LFP sample

| <b>LiFePO<sub>4</sub> (Space Group Pnma) Phase Ratio: 100.00%</b> |                            |                             |                              |                                 |
|-------------------------------------------------------------------|----------------------------|-----------------------------|------------------------------|---------------------------------|
| <b>Lattice Parameters</b>                                         | <b><i>a</i> / Å</b>        | <b><i>b</i> / Å</b>         | <b><i>c</i> / Å</b>          | <b><i>V</i> / Å<sup>3</sup></b> |
|                                                                   |                            | 10.3351                     | 6.0110                       | 4.6943                          |
| <b>Li-Fe Anti-sites</b>                                           | 1.20%                      |                             |                              |                                 |
| <b>Agreement Factors</b>                                          |                            |                             |                              |                                 |
| <b><math>\chi^2</math> 4.70%</b>                                  | <b>R<sub>p</sub> 3.75%</b> | <b>R<sub>wp</sub> 5.00%</b> | <b>R<sub>exp</sub> 2.30%</b> |                                 |

Table S4 Rietveld refinement results of high-resolution powder XRD of SA-LFP sample

| <b>LiFePO<sub>4</sub> (Space Group Pnma) Phase Ratio: 100.00%</b> |                            |                             |                              |                                 |
|-------------------------------------------------------------------|----------------------------|-----------------------------|------------------------------|---------------------------------|
| <b>Lattice Parameters</b>                                         | <b><i>a</i> / Å</b>        | <b><i>b</i> / Å</b>         | <b><i>c</i> / Å</b>          | <b><i>V</i> / Å<sup>3</sup></b> |
|                                                                   |                            | 10.3293                     | 6.0073                       | 4.6915                          |
| <b>Li-Fe Anti-sites</b>                                           | 1.70%                      |                             |                              |                                 |
| <b>Agreement Factors</b>                                          |                            |                             |                              |                                 |
| <b><math>\chi^2</math> 4.56%</b>                                  | <b>R<sub>p</sub> 3.53%</b> | <b>R<sub>wp</sub> 4.65%</b> | <b>R<sub>exp</sub> 2.18%</b> |                                 |

Table S5 Rietveld refinement results of XRD of LA-LFP sample after cycles

| <b>LiFePO<sub>4</sub> (Space Group Pnma) Phase Ratio: 100.00%</b> |                            |                             |                              |                                 |
|-------------------------------------------------------------------|----------------------------|-----------------------------|------------------------------|---------------------------------|
| <b>Lattice Parameters</b>                                         | <b><i>a</i> / Å</b>        | <b><i>b</i> / Å</b>         | <b><i>c</i> / Å</b>          | <b><i>V</i> / Å<sup>3</sup></b> |
|                                                                   |                            | 10.2911                     | 5.9809                       | 4.6728                          |
| <b>Li-Fe Anti-sites</b>                                           | 1.30%                      |                             |                              |                                 |
| <b>Agreement Factors</b>                                          |                            |                             |                              |                                 |
| <b><math>\chi^2</math> 5.03%</b>                                  | <b>R<sub>p</sub> 4.59%</b> | <b>R<sub>wp</sub> 5.86%</b> | <b>R<sub>exp</sub> 2.61%</b> |                                 |

Table S6 Rietveld refinement results of XRD of SA-LFP sample after cycles

| <b>LiFePO<sub>4</sub> (Space Group Pnma) Phase Ratio: 100.00%</b> |                            |                             |                             |                                 |
|-------------------------------------------------------------------|----------------------------|-----------------------------|-----------------------------|---------------------------------|
| <b>Lattice Parameters</b>                                         | <b><i>a</i> / Å</b>        | <b><i>b</i> / Å</b>         | <b><i>c</i> / Å</b>         | <b><i>V</i> / Å<sup>3</sup></b> |
|                                                                   |                            | 10.2775                     | 5.9779                      | 4.6643                          |
| <b>Li-Fe Anti-sites</b>                                           | 3.30%                      |                             |                             |                                 |
| <b>Agreement Factors</b>                                          |                            |                             |                             |                                 |
| <b><math>\chi^2</math> 3.79%</b>                                  | <b>R<sub>p</sub> 3.94%</b> | <b>R<sub>wp</sub> 5.06%</b> | <b>R<sub>exp</sub> 2.6%</b> |                                 |
